# Supplementary material for: Cyclodextrin-/photoisomerization-modulated assembly and disassembly of an azobenzene-grafted polyoxometalate cluster
Source: Royal Society of Chemistry journal article supplement (doi:10.1039/c8dt05146a), 2019-01-01
Supplement: c8dt05146a1.pdf [file c8dt05146a1.pdf]

## Supporting Information

### Cyclodextrin-/Photoisomerization- Modulated Assembly and Disassembly of An Azobenzene-Grafted Polyoxometalate Cluster

Hongbo Li, Fengrui Jiang, Guohua Zhang, Bao Li, and Lixin Wu\*

State Key Laboratory of Supramolecular Structure and Materials, College of Chemistry,

Jilin University, Changchun 130012 P. R. China

E-mail: [wulx@jlu.edu.cn](mailto:wulx@jlu.edu.cn)

### Table of Contents

#### 1. Characterization of POM-Azo

|                             |    |
|-----------------------------|----|
| FT-IR spectra               | S2 |
| <sup>1</sup> H NMR spectrum | S2 |
| TGA curve                   | S3 |
| Elemental analysis          | S3 |
| XRD pattern                 | S7 |

#### 2. Characterization of POM-Azo with $\alpha$ -CD

|                            |    |
|----------------------------|----|
| <sup>1</sup> H NMR spectra | S3 |
| UV-Vis spectra             | S4 |
| 2D NOESY NMR spectrum      | S4 |

#### 3. Characterization of POM-Azo in *trans* and *cis* states

|                            |    |
|----------------------------|----|
| UV-vis spectra             | S5 |
| <sup>1</sup> H NMR spectra | S5 |

#### 4. Characterization of POM-Azo with $\beta$ -CD

|                            |    |
|----------------------------|----|
| <sup>1</sup> H NMR spectra | S6 |
| 2D NOESY NMR spectrum      | S6 |
| DLS curves                 | S7 |

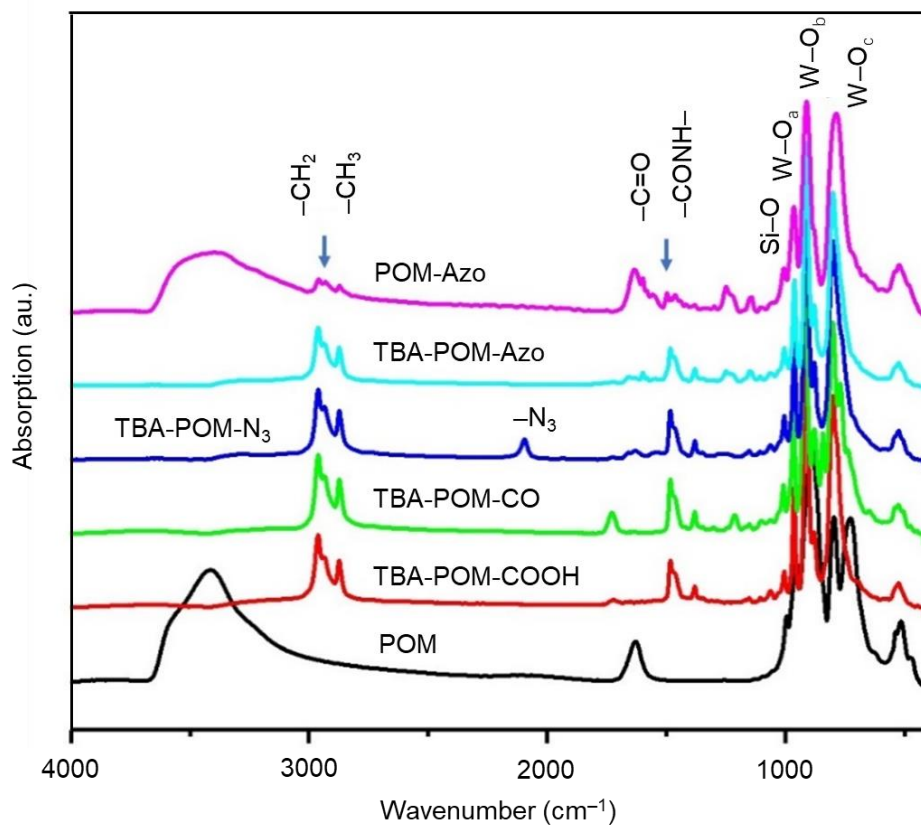

**Fig S1.** FT-IR spectra of Keggin POM, organic grafted intermediates, the inclusion complexes, and final product in KBr pellets.

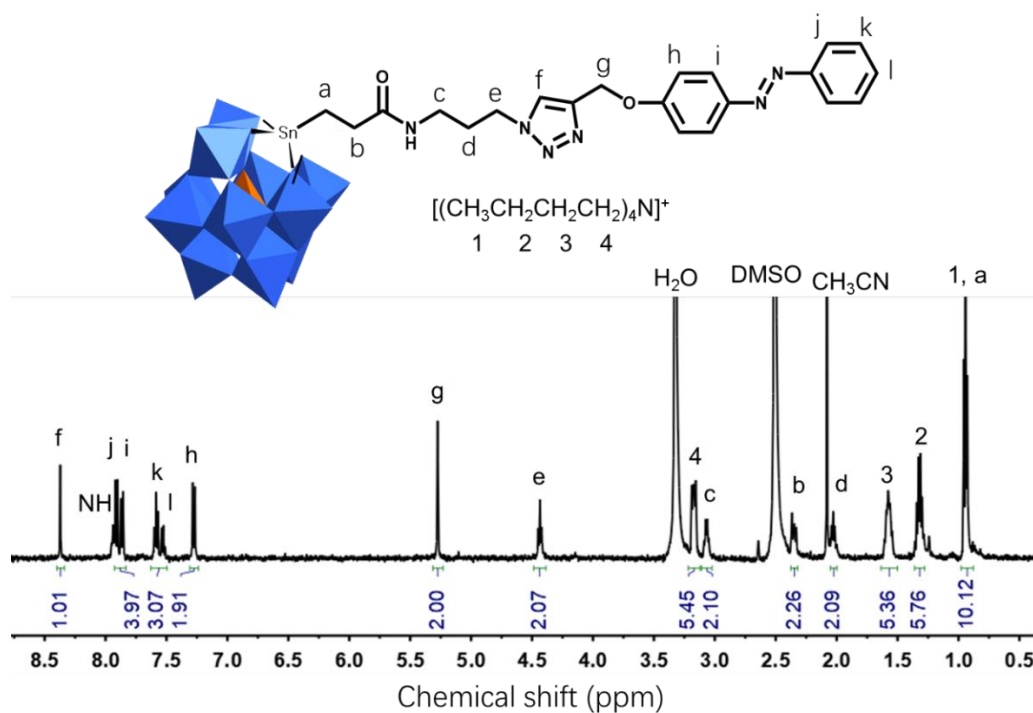

**Fig S2.**  $^1\text{H}$  NMR spectrum of POM-Azo complex. ( $\text{DMSO-}d_6$ ,  $25^\circ\text{C}$ ,  $0.15\text{ mM}$ )

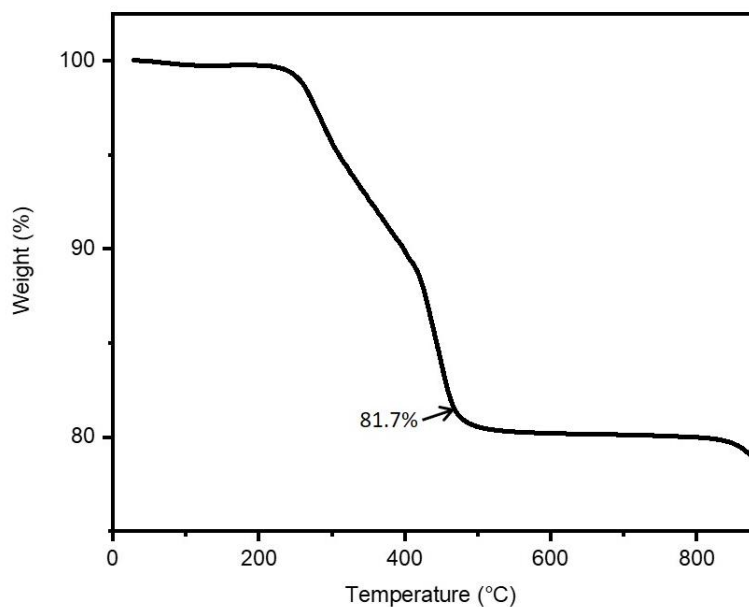

**Fig S3.** TGA curve of POM-Azo complex.

**Table S1.** The elemental analysis result of prepared POM-Azo in a chemical formula of  $H_{4.3}TBA_{0.7}[SiW_{11}O_{39}Sn(C_6H_{11}ON)(C_2HN_3)CH_2O(C_{12}H_9N_2)]$ .

|            | C     | H    | N    | Si   | W     | Sn   |
|------------|-------|------|------|------|-------|------|
| Calcd. (%) | 11.52 | 1.58 | 2.79 | 0.84 | 60.21 | 3.54 |
| Found (%)  | 11.48 | 1.61 | 2.80 | 0.84 | 60.25 | 3.55 |

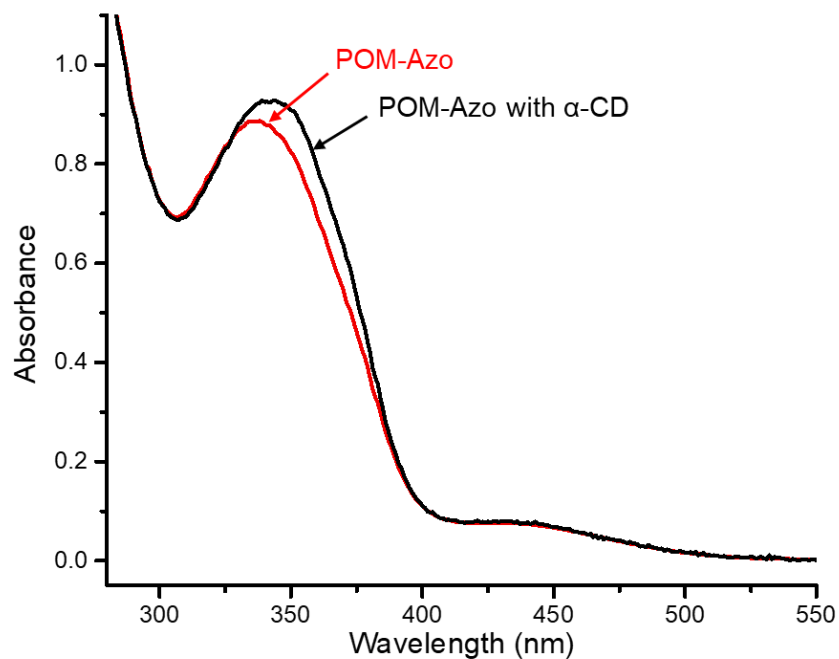

**Fig. S4.** UV-Vis spectra of POM-Azo in water with and without addition of  $\alpha$ -CD (10 molar ratio) at 25 °C.

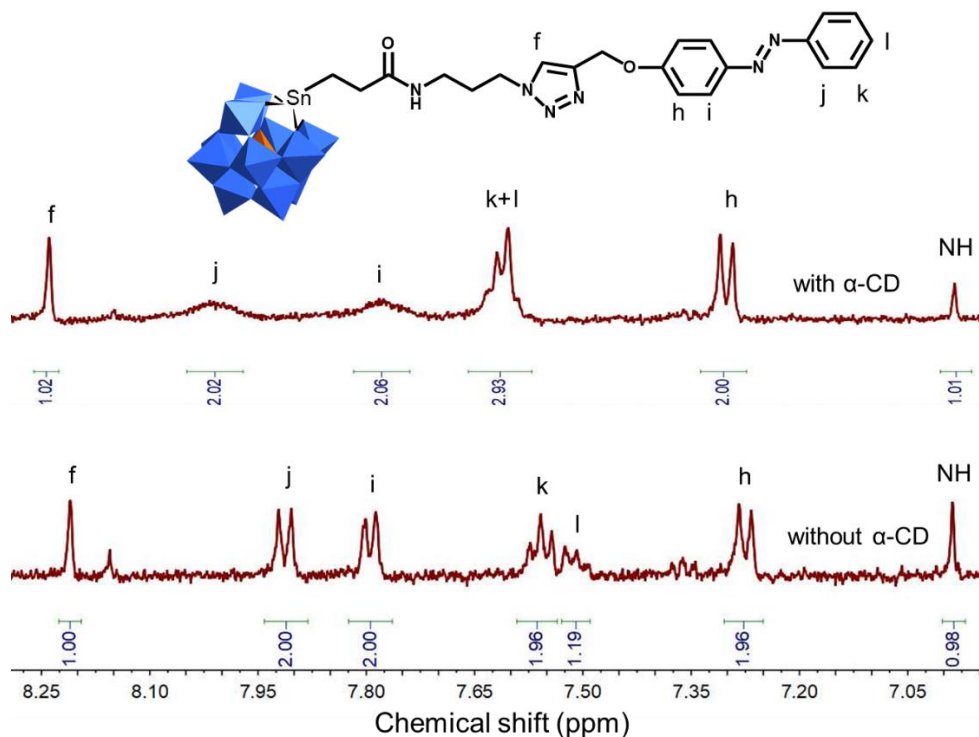

**Fig S5.** <sup>1</sup>H NMR spectra of POM-Azo with and without addition of α-CD in D<sub>2</sub>O (0.15 mM, 25 °C).

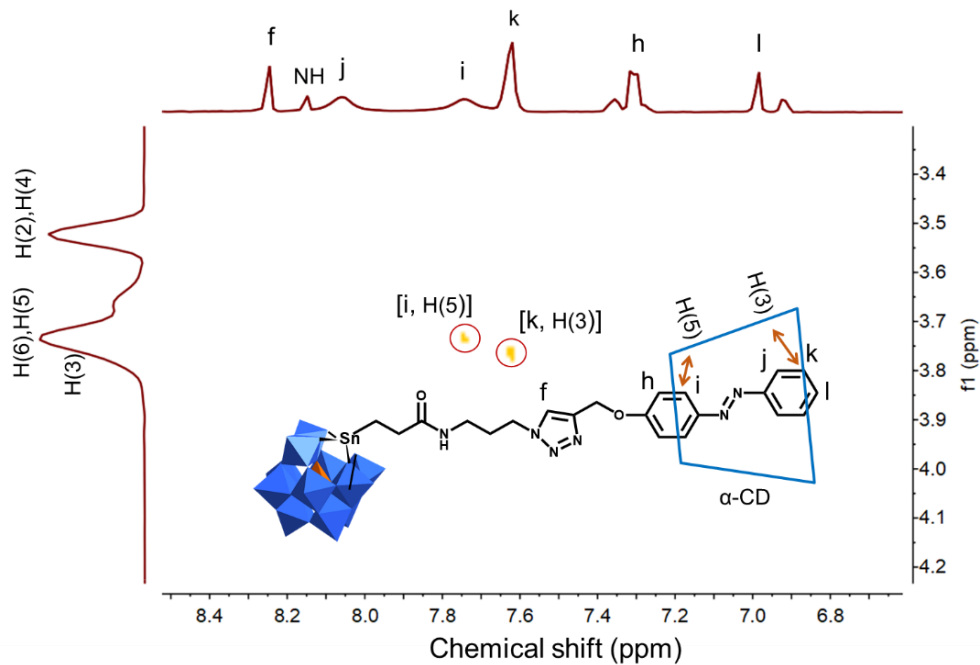

**Fig S6** 2D NOESY NMR spectrum of POM-Azo (*trans*) with α-CD in D<sub>2</sub>O (25 °C, 0.15 mM). Two cross-correlation points appear and are marked in yellow.

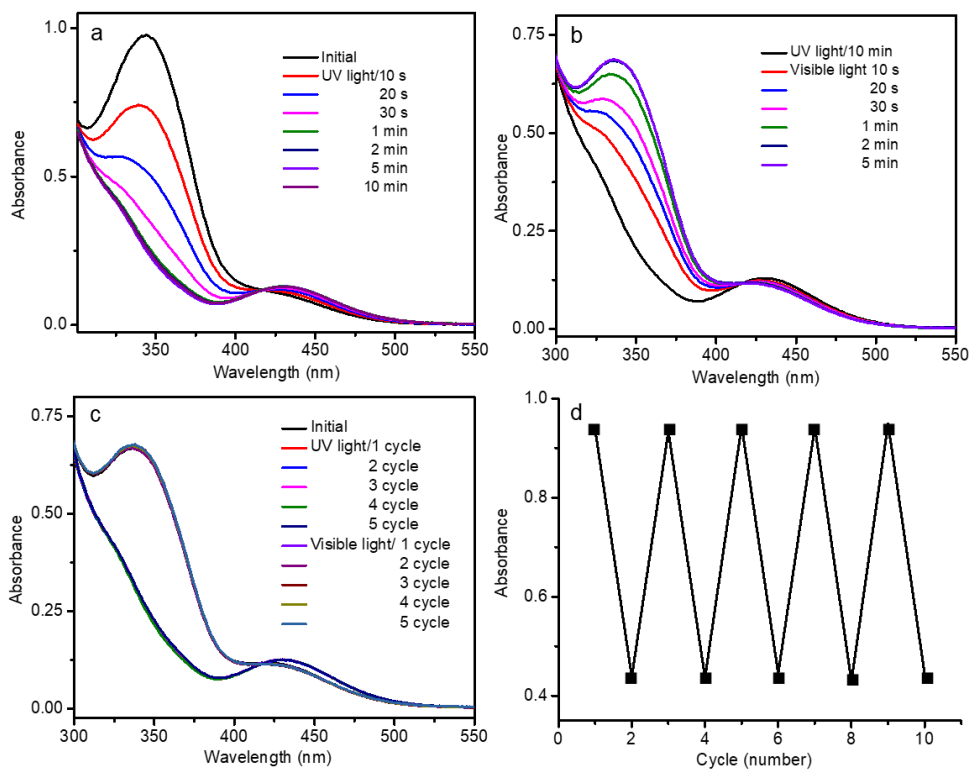

**Fig S7.** UV-vis spectra of POM-Azo in water (8.4  $\mu\text{M}$ ) under different irradiation time upon a) UV light irradiation, and b) visible light irradiation, and c) undergo 5 cycles of alternate UV light (365 nm) and visible light (450 nm) irradiation, d) Plots of (c) absorbance at  $\lambda = 344$  nm.

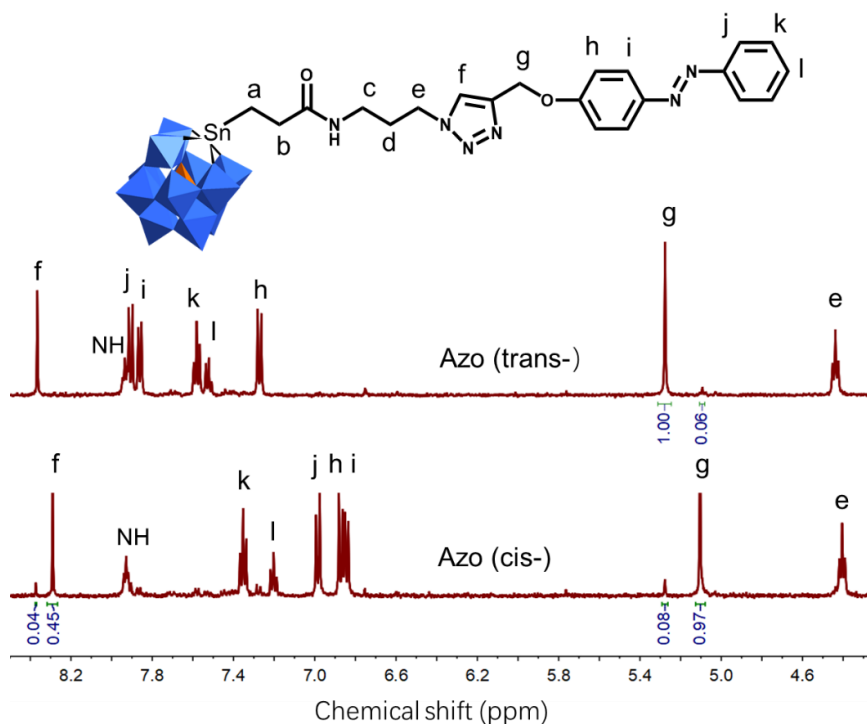

**Fig S8.**  $^1\text{H}$  NMR spectra of POM-Azo in *trans* and *cis* states in  $\text{DMSO-}d_6$  (25  $^\circ\text{C}$ , 0.15 mM).

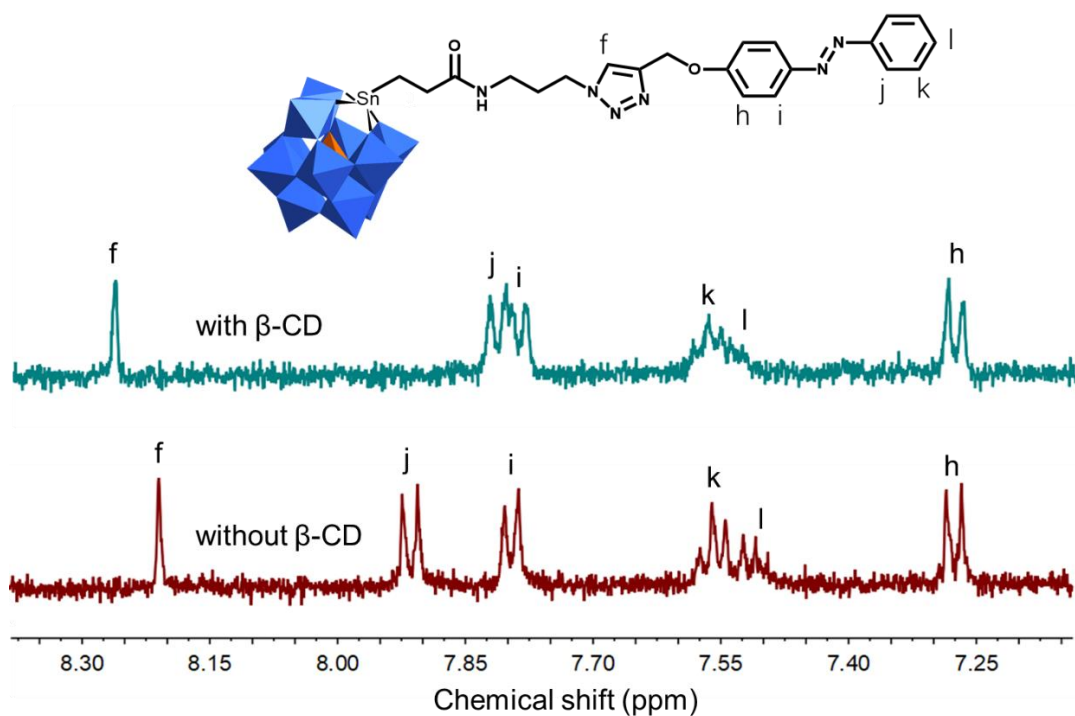

**Fig S9.**  $^1\text{H}$  NMR spectra of POM-Azo with (top) and without (down)  $\beta\text{-CD}$ . ( $\text{D}_2\text{O}$ ,  $25^\circ\text{C}$ ,  $0.15\text{ mM}$ )

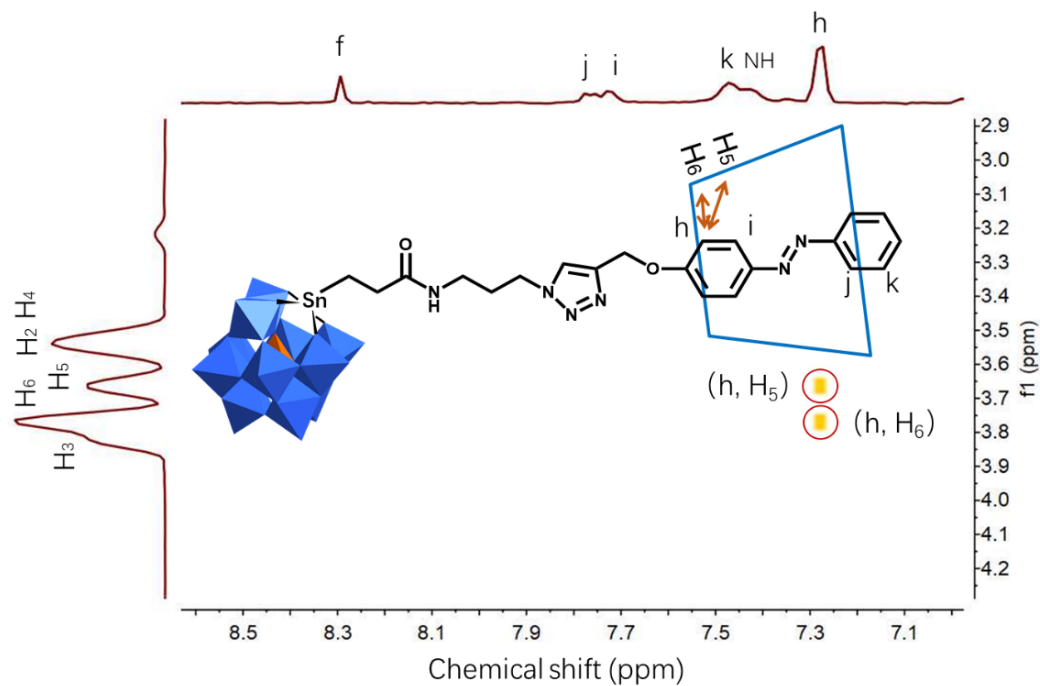

**Fig S10.** 2D NOESY NMR spectrum of POM-Azo (*trans*) with  $\beta\text{-CD}$  in water. ( $\text{D}_2\text{O}$ ,  $25^\circ\text{C}$ ,  $0.15\text{ mM}$ ). Two cross-correlation peaks appear in NOESY NMR spectrum, implying the formation of the inclusion complex between POM-Azo (*trans*) and  $\beta\text{-CD}$ .

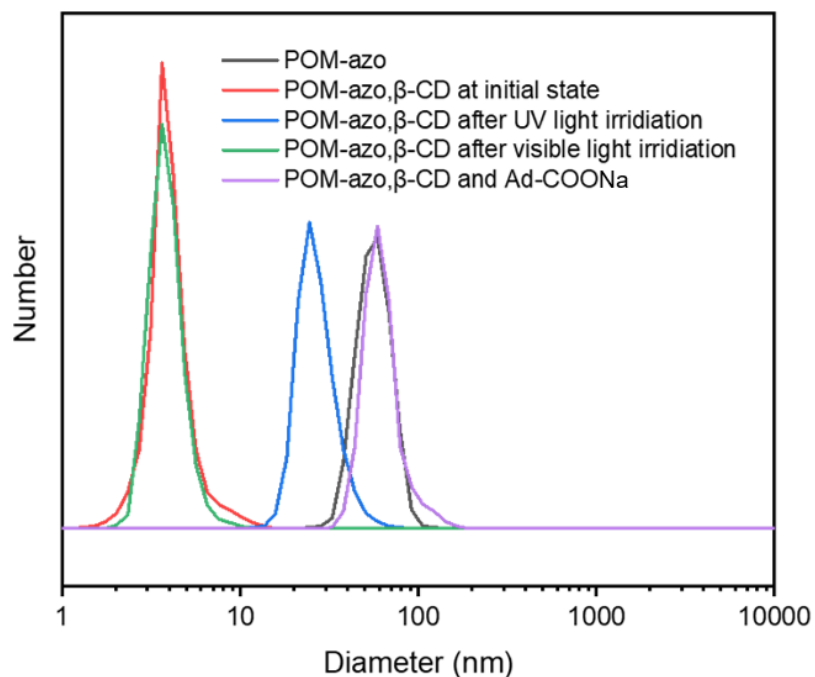

**Fig S11.** DLS curves in water, 25 °C for (black) pure POM-Azo complex, (red) POM-Azo interact with  $\beta$ -CD (1:1), (blue) POM-Azo with  $\beta$ -CD under 0.5 h UV light irradiation, (green) POM-Azo with  $\beta$ -CD under 0.5 h visible light irradiation, (purple) POM-Azo,  $\beta$ -CD and Ad-COONa with the ratio of 1:1:1.1.

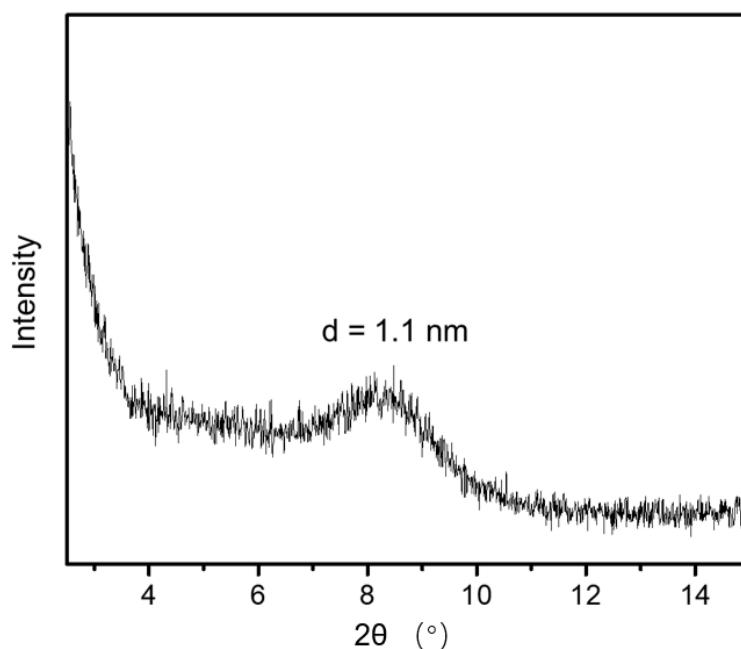

**Fig S12.** X-ray diffraction pattern of POM-Azo assembly prepared from water.
